# Supplementary material for: Circular RNA cFAM210A, degradable by HBx, inhibits HCC tumorigenesis by suppressing YBX1 transactivation
Source: PubMed Central journal article supplement (PMC10689457; doi:10.1038/s12276-023-01108-8), 2023-11-01
Supplement: 12276_2023_1108_MOESM2_ESM.pdf [file 12276_2023_1108_MOESM2_ESM.pdf]

## Supplementary materials and methods

### Follow-up

The patients of cohort 3 received check-ups every 2–3 months after surgery during the first 24 months and every 3–6 months thereafter until November 10, 2016. The median follow-up period was 45.2 months. Physicians who were blinded to the study performed the follow-up examinations. Serum AFP levels and abdominal ultrasound examinations were performed every month during the first year after surgery and every 3–6 months thereafter. Computed tomography and/or magnetic resonance imaging were performed every 3–6 months or when a recurrence was suspected. The diagnosis of recurrence was based on the diagnosis criteria from the AASLD Practice Guidelines (<http://www.aasld.org/practiceguidelines/Documents/Bookmarked%20Practice%20Guidelines/HCCUpdate2010.pdf>) Once recurrence was confirmed, further treatment was implemented based on the tumor diameter, the number of tumors, the location of the tumor, and the extent of vessel invasion as well as liver function and performance statuses. Recurrence-free survival (RFS) was calculated from the date of tumor resection until the detection of tumor recurrence, death from a cause other than HCC, or the last follow-up visit.

### Whole transcriptome sequencing and identification of differentially expressed circRNAs

Total RNA was extracted from HBx-overexpressing (HBx-oe) and NC (negative control) HepG2 cells using Trizol reagent (Invitrogen, CA) following the manufacturer's protocol. The RNA concentration and quality were evaluated with the NanoDrop 2000 Spectrophotometer (Thermo Fisher Scientific, Wilmington, DE, USA) and Agilent 2100 Bioanalyzer (Agilent Technologies).

Firstly, rRNA was depleted by NEBNext rRNA Depletion Kit (New England Biolabs, Inc., Massachusetts, USA) according to the manufacturer's protocol. Secondly, sequencing libraries were prepared using NEBNext<sup>®</sup> Ultra<sup>™</sup> II Directional RNA Library Prep Kit (New England Biolabs, Inc., Massachusetts, USA). BioAnalyzer 2100 system (Agilent Technologies, USA) was used in quality control. The libraries were sequenced on an Illumina HiSeq 4000 platform (Illumina, San Diego, CA, USA) according to the manufacturer's instructions, and 150-bp paired-end reads were generated. Cutadapt (V1.9.3) <sup>1</sup> was used to acquire high-quality reads.

The high-quality reads were then mapped to the Homo sapiens Hg19 genome using STAR (V2.5.1b)<sup>2</sup>. CircRNAs were identified by DCC (V0.4.4)<sup>3</sup> and annotated by circBase<sup>4</sup> and Circ2Traits<sup>5</sup>. The differentially expressed circRNAs between HBx-oe and NC HepG2 cells were screened by edge R.<sup>6</sup> We used threshold values of  $\geq 2$  (or  $\leq 0.5$ )-fold change and a *P* value  $< 0.05$ .

### Quantitative real-time PCR

1 Total RNAs were extracted using Trizol reagent (Invitrogen, CA). The first-strand cDNA was generated  
2 using the M-MLV Reverse Transcriptase kit (Invitrogen, CA) with random primers. Real-time PCR  
3 reactions were performed in the StepOne™ Real-Time PCR System (Applied Biosystems, Foster City, CA).  
4 The real-time PCR reactions were performed in triplicate. ACTB were employed as endogenous control for  
5 mRNA and miRNAs, respectively. The relative expression was calculated using the comparative  $\Delta\Delta C_t$   
6 method. The primer sequences are presented in Supplementary Table 6.

### 7 **Transient transfection**

8 The transient transfection of small interfering RNAs and plasmids were performed using the  
9 Lipofectamine 3000 kit (Invitrogen) according to the manufacturer's instructions. The siRNA sequences are  
10 listed in Supplementary Table 6.

### 11 **Western blot analysis:**

12 Total protein was extracted from snap-frozen tissues with RIPA Lysis Buffer and PMSF (Beyotime Co.,  
13 China) according to the manufacturer's instructions. Western blotting was performed as described  
14 previously<sup>7</sup>. Antibody binding was detected with an Odyssey infrared scanner (Li-Cor Biosciences Inc.).  
15 The antibodies used are listed in Supplementary Table 7.

### 16 **Cell lines**

17 Hep3B, HepG2, Huh7 and MHCC97H cells were obtained from the Chinese Academy of Sciences Cell  
18 Bank and were authenticated by short tandem repeat (STR) profiling. Cells were grown in Dulbecco's  
19 modified Eagle's medium with 10% foetal bovine serum (Gibco BRL). Cells were maintained in an  
20 atmosphere of 5% CO<sub>2</sub> in a humidified 37°C incubator. Primary human hepatocyte (HH) (Lot #M00995-P)  
21 was obtained from RILDbiotech (Shanghai, China) and cultured as described previously<sup>8</sup>.

### 22 **RNA immunoprecipitation.**

23 RNA immunoprecipitation (RIP) experiments were performed using a Magna RIP™ RNA-Binding  
24 Protein Immunoprecipitation Kit (Millipore, USA) according to the manufacturer's instructions.

### 25 **Actinomycin D assay**

26 The Actinomycin D assay was performed as previously described<sup>9-11</sup>. HCC cells were equally seeded in  
27 5 wells in 24-well plates (5 × 10<sup>4</sup> cells per well). 24 hours later, the cells were exposed to actinomycin D  
28 (2µg/ml, Abcam, ab141058) for 0h, 12h, 24h and 48h, respectively. After that, the cells were harvested and  
29 the relative RNA levels of cFAM210A were analyzed by qRT-PCR and normalized to the values measured in  
30 the mock treatment group (the 0h group).

### 31 **Promoter luciferase reporter assay**

1 The promoter of RBM15 and MET were inserted into the vector GV238 (Genechem) respectively.  
2 Dual-luciferase reporter assay was carried out completely in line with the manufacturer's instructions  
3 (Beyotime, Shanghai, China).

#### 4 **Dual RNA fluorescence in situ hybridization (FISH) and immunofluorescence assay**

5 CY3-labeled probe (Supplementary Table 5) to cFAM210A back-slice sequence was synthesized by  
6 RiboBio (Guangzhou, China). The probe signals were detected by the Fluorescent In Situ Hybridization Kit  
7 (RiboBio), following the manufacturer's instructions. HepG2 cells were incubated with antibodies specific  
8 for human YBX1 (20339-1-AP, Proteintech Group) at 4°C overnight and then with FITC-labeled goat  
9 anti-rabbit IgG for 30 minutes. Subsequently, the nuclei were re-dyed with DAPI. Images were taken with  
10 Nikon Eclipse E200 Microscope (Japan).

#### 11 **Cell viability assays**

12 Cell viability was evaluated using the cell counting kit 8 (CCK8; Dojindo, Kumamoto, Japan) assay.  
13 Transfected cells were plated onto a 96-well plate at a cell density of 2000 cells per well for 24 h. Next, the  
14 viability of the cells was measured at 450 nm using Synergy 2 (BioTek, USA) every 24 h for 4 days. 10 µL  
15 of CCK8 assay was added 2 hours before measurement.

#### 16 **5-Ethynyl-20-deoxyuridine (EdU) incorporation assays**

17 The EdU assay was carried out with a Cell Light EdU DNA Cell Proliferation Kit (RiboBio, Shanghai,  
18 PR, China) according to the protocol as described before.<sup>12</sup> Images were acquired with Zeiss axiophot  
19 photomicroscope (Carl Zeiss) and Image-Pro plus 6.0 software, and the percentage of EdU-positive cells  
20 was calculated.

#### 21 **Sphere formation assays**

22 The spheres formation assay was performed as previously described.<sup>12</sup> 1000 cells per well were seeded in  
23 ultra-low adherent-conditioned plates (Corning, USA) with serum-free DMEM medium containing B27  
24 supplement (1:50; Invitrogen), 20 ng/mL epidermal growth factor (Invitrogen) and 20 ng/mL basic  
25 fibroblast growth factor (Invitrogen) for 14 days to test their ability of forming primary spheres. On day14,  
26 cell sphere number of spheres was counted using an inverted microscope (Olympus, Tokyo, Japan).

#### 27 **In vitro limiting dilution assays**

28 HCC cells were seeded into 96-well ultra-low attachment culture dishes at cell doses described in the  
29 body of article and incubated in spheroid-forming conditions for 14 days. Sphere formation was assessed by  
30 visual inspection. Based on the frequency of wells without spheroids, the proportion of spheroid-initiating  
31 cells was determined using Poisson's distribution statistics and the L-Cal software program (Version 1.1;

1 Stem Cell Technologies, Inc., Vancouver, British Columbia, Canada).

2 **In vivo limiting dilution assays**

3 Male nude mice were purchased from the Laboratory Animal Resources, Chinese Academy of Sciences  
4 (Beijing, China) and received humane care. Various amounts of HCC cells were injected subcutaneously of  
5 nude mice, as described before.<sup>12</sup> Kinetics of tumor formation were estimated twice weekly, and mice were  
6 monitored for 8 weeks. Frequency of tumor-initiating cells was determined using Poisson's distribution  
7 statistics and the L-Calc software program (Version 1.1; Stem Cell Technologies).

8

1 **Supplementary Table 5. Clinical Characteristics of 20 liver hemangioma and 100 HCC patients in this**  
 2 **study**

3

|                                        | liver      | HCC      |          |
|----------------------------------------|------------|----------|----------|
|                                        | hemangioma | Cohort 2 | Cohort 3 |
|                                        | Cohort 1   |          |          |
| All cases                              | 20         | 20       | 80       |
| Age, years,>50: ≤50                    | 8:12       | 7:13     | 38:42    |
| Gender, male/female                    | 11:9       | 13:8     | 66:14    |
| HBsAg, positive/negative               | 0:20       | 20:0     | 80:0     |
| Liver cirrhosis, with/without          | 0:20       | 5:15     | 43:37    |
| AFP, µg/L,>20: ≤20                     | 0:20       | 16:4     | 54:26    |
| Tumour size, cm,>5: ≤5                 | /          | 7:13     | 44:36    |
| No. tumour, multiple: solitary         | /          | 5:15     | 13:67    |
| Edmondson's grade, III+IV: I+II        | /          | 16:4     | 64:16    |
| Microvascular invasion, present:       |            |          |          |
| absent                                 | /          | 4:16     | 25:55    |
| Pathological satellite, present/absent | /          | 8:12     | 35:45    |
| Encapsulation, incomplete/complete     | /          | 13:7     | 47:33    |
| TNM stage, II+III: I                   | /          | 4:16     | 19:61    |
| BCLC stage, B+C: A                     | /          | 5:15     | 21:59    |

4

5

**Supplementary Table 6. Primers, Probes and RNA sequences used in this study**

| <b>Primers for qRT-PCR</b> |                           |
|----------------------------|---------------------------|
| Primer Name                | Sequence (5'-3')          |
| ACTB-F                     | CCACCATGTACCCTGGCATTG     |
| ACTB-R                     | TCATCTTGTTTTCTGCGCAAGTTA  |
| ADAR1-F                    | CGAGAATCCCAAACAAGGAA      |
| ADAR1-R                    | CTGGATTCCACAGGGATTGT      |
| ALDH1A1-F                  | GCACGCCAGACTTACCTGTC      |
| ALDH1A1-R                  | CCTCCTCAGTTGCAGGATTAAG    |
| ALKBH5-F                   | CCCGAGGGCTTCGTCAACA       |
| ALKBH5-R                   | CGACACCCGAATAGGCTTGA      |
| CBLL1-F                    | TGTGCAGCGAATTGAGCAGT      |
| CBLL1-R                    | GCACGGGTAACAGGTTTTCCA     |
| cBPTF-F                    | AAAGCTGACGGAATTTGTGGC     |
| cBPTF-R                    | GTACCTGCATCTGGGGTGAC      |
| CD133-F                    | AGTCGGAAACTGGCAGATAGC     |
| CD133-R                    | GGTAGTGTTGTACTGGGCCAAT    |
| CD13-F                     | GACCAAAGTAAAGCGTGAATCG    |
| CD13-R                     | TCTCAGCGTCACCCGGTAG       |
| CD24-F                     | CTCCTACCCACGCAGATTTATTC   |
| CD24-R                     | AGAGTGAGACCACGAAGAGAC     |
| CD44-F                     | CTGCCGCTTTGCAGGTGTA       |
| CD44-R                     | CATTGTGGGCAAGGTGCTATT     |
| CD90-F                     | ATCGCTCTCCTGCTAACAGTC     |
| CD90-R                     | CTCGTACTGGATGGGTGAACT     |
| cDNA2-F                    | CACTTCGACTGACTTCCCTCA     |
| cDNA2-R                    | CCAGGCGCTTTTCACAGTTT      |
| cFAM210A-F                 | CACAGCTCAGGGAAGTCCG       |
| cFAM210A-R                 | TGCGTGCCAGTCGAGATAC       |
| cFAM210A-MeRIP-F           | AGCCTGATCCTTTGCAAGACA     |
| cFAM210A-MeRIP-R           | AGGGCCTTGTACCAAAACCA      |
| cIQGAP1-F                  | AGAGAAAGAGATGTTTATGAGGAGC |
| cIQGAP1-R                  | AAGATGCCCCCAATCTTGCTA     |
| cMGAT5-F                   | TTACCATCCAGCAGCGAACT      |
| cMGAT5-R                   | TCTTTGCAAGCGGCCCAAAA      |
| cPPP1R13B-F                | CCAAGAGCAACGAACTCAGAGA    |
| cPPP1R13B-R                | CCTCCGTGGACCCCATTC        |
| cPRPSAP1-F                 | AGATCCTGAAAGAGAGAGGCG     |
| cPRPSAP1-R                 | CGATGATTGCGATGCGGC        |
| cTRIM24-F                  | CATACCGGTTACGGCACCTC      |

|            |                           |
|------------|---------------------------|
| cTRIM24-R  | CAGCTTCAGCTGCTCCTTTTT     |
| cZCCHC2-F  | GACTGAGATACGCACCTCCC      |
| cZCCHC2-R  | TGTGTACAGCTTCTCGCTGA      |
| DHX9-F     | TGCCTCCAAGAAAGTCCA        |
| DHX9-R     | TCCGCTTCCATTGTCGTAT       |
| EPCAM-F    | AATCGTCAATGCCAGTGTACTT    |
| EPCAM-R    | TTCATCGCAGTCAGGATCATAA    |
| FTO-F      | TGGGTTTCATCCTACAACGG      |
| FTO-R      | CCTCTTCAGGGCCTTCAC        |
| FUS-F      | AACTTCGTTGCTTGCTTGCC      |
| FUS-R      | TGGCCATAGCCTGAAGTGTC      |
| HBx-F      | CTGCAATGTCAACGACCGAC      |
| HBx-R      | TGCGCAGACCAATTTATGCC      |
| HRSP12-F   | GCTGCAAGAGGGAAGGCTTA      |
| HRSP12-R   | TCCACTTGAAGGGTCCATGC      |
| KIAA1429-F | GAATACTGATGGTCTGGTGCTA    |
| KIAA1429-R | CTTGGCTGTGGTCTTGGA        |
| MDR1-F     | GGGAGCTTAACACCCGACTTA     |
| MDR1-R     | GCCAAAATCACAAGGGTTAGCTT   |
| MET-F      | AGCAATGGGGAGTGTAAGAGG     |
| MET-R      | CCCAGTCTTGTACTCAGCAAC     |
| METTL14-F  | AGAAACTTGCAGGGCTTCCT      |
| METTL14-R  | TCTTCTTCATATGGCAAATTTTCTT |
| METTL16-F  | AGACCTCCGCCTAGTTCTGT      |
| METTL16-R  | GGGAACCCCTTGTATGCGAA      |
| METTL3-F   | AAGCTGCACTTCAGACGAAT      |
| METTL3-R   | GGAATCACCTCCGACTC         |
| mFAM210A-F | CCTTCGCCATAAGCAAGGGA      |
| mFAM210A-R | CCACACTGTCAGGTAACCCA      |
| NF90-F     | GCCATTACGCCATGAAACG       |
| NF90-R     | AATGAATTGCCATCAACCTCCA    |
| POP1-F     | AGCCATCTGATGAAGTGGGC      |
| POP1-R     | AAGTGGCCAAGATGGACAG       |
| QKI-F      | CAAACGGAACTCCTCACCC       |
| QKI-R      | GCCACCGCACCTAATACAC       |
| RBM15B-F   | TACACGGAGGCTACCAGTACA     |
| RBM15B-R   | GTCGTACAGCCCGTAGTAGTC     |
| RBM15-F    | TGGTGTCCCTAAAGGGAGGAA     |
| RBM15-R    | AGGCCCATGTAAACTCCACA      |
| WTAP-F     | GCTTTGGAGGGCAAGTACAC      |
| WTAP-F     | TTGTAATGCGACTAGCAACCAA    |



|                          |                                       |
|--------------------------|---------------------------------------|
| WTAP-R                   | TCCTTGGTTGCTAGTCGCAT                  |
| WTAP-R                   | GCTGGGTCTACCATTGTTGATCT               |
| YTHDF1-F                 | AATAACCAGCTCCGGCACAT                  |
| YTHDF1-R                 | AACTGGTTCGCCCTCATTGT                  |
| YTHDF2-F                 | TAGCCAGCTACAAGCACACC                  |
| YTHDF2-R                 | TGCAAGTCTGCAATCGTCTCT                 |
| ZC3H13-F                 | GTGCCGTAACCTGGCTGAAGA                 |
| ZC3H13-R                 | CCTTTACCACGAGGTGAAGGG                 |
| <b>FISH probes</b>       |                                       |
| cFAM210A                 | 5-CY3-GAUAGGUUUCAGCUUUUUAAGGCUGCAUA-3 |
| <b>siRNAs</b>            |                                       |
|                          |                                       |
| cFAM210A-siRNA/s<br>hRNA | r(UGCAGCCUUGAAAAGCUGA)d(TT)           |
| HRSP12-siRNA             | r(UGUAAUAGGGAGAGUUGAA)d(TT)           |
| POP1-siRNA               | r(GAAUUUAACCGUAGACAAA)d(TT)           |
| RBM15-siRNA              | r(GGUGAUAGUUGGGCAUAUA)d(TT)           |
| YTHDF2-siRNA             | r(AAGGACGUUCCCAAUAGCCAA)d(TT)         |

1

2

1

2

**Supplementary Table 7. The antibodies used in this study**

| <b>Antibody</b>              | <b>Supplier</b> | <b>Catalogue number</b> | <b>Primary/secondary</b> | <b>Host</b> | <b>Mono-/polyclonal</b> |
|------------------------------|-----------------|-------------------------|--------------------------|-------------|-------------------------|
| ACTB                         | Proteintech     | 66009-I-1g              | P                        | mouse       | m                       |
| ADAR1                        | Abcam           | ab168809                | P                        | rabbit      | p                       |
| AGO2                         | Abcam           | ab32381                 | P                        | rabbit      | P                       |
| ALKBH5                       | Abcam           | ab195377                | P                        | rabbit      | m                       |
| Anti-Flag                    | GenScript       | A00187                  | P                        | mouse       | m                       |
| CBLL1                        | Proteintech     | 21179-1-AP              | P                        | rabbit      | P                       |
| DHX9                         | Abcam           | ab26271                 | P                        | rabbit      | P                       |
| FAM210A                      | Abcam           | ab151142                | P                        | rabbit      | P                       |
| FTO                          | Abcam           | ab126605                | P                        | rabbit      | m                       |
| FUS                          | Abcam           | ab124923                | P                        | rabbit      | m                       |
| GAPDH                        | Abcam           | ab8245                  | P                        | mouse       | m                       |
| HBx                          | Abcam           | ab2741                  | P                        | mouse       | m                       |
| Histone H3                   | Abcam           | ab201456                | P                        | rabbit      | m                       |
| HRSP12                       | Proteintech     | 12930-1-AP              | P                        | rabbit      | P                       |
| KIAA1429                     | Abcam           | ab271136                | P                        | rabbit      | m                       |
| MET                          | CST             | 8198                    | P                        | rabbit      | m                       |
| METTL14                      | CST             | 51104                   | P                        | rabbit      | m                       |
| METTL16                      | Proteintech     | 19924-1-AP              | P                        | rabbit      | P                       |
| METTL3                       | Affinity        | DF12020                 | P                        | rabbit      | P                       |
| NF90/NF110                   | Abcam           | ab92355                 | P                        | rabbit      | m                       |
| POP1                         | Proteintech     | 12029-1-AP              | P                        | rabbit      | P                       |
| P-AKT                        | Abcam           | ab81283                 | P                        | rabbit      | m                       |
| P-YBX1 <sup>S102</sup>       | Abcam           | ab138654                | P                        | rabbit      | P                       |
| QKI                          | Abcam           | ab195960                | P                        | rabbit      | p                       |
| RBM15                        | Proteintech     | 10587-1-AP              | P                        | rabbit      | P                       |
| RBM15B                       | Proteintech     | 22249-1-AP              | P                        | rabbit      | P                       |
| RPS3                         | Proteintech     | 66046-1-Ig              | P                        | mouse       | m                       |
| SNRPF                        | Abcam           | ab154870                | P                        | rabbit      | m                       |
| WTAP                         | Abcam           | ab195380                | P                        | rabbit      | m                       |
| YBX1                         | Proteintech     | 20339-1-AP              | P                        | rabbit      | P                       |
| YTHDF2                       | Abcam           | ab220163                | P                        | rabbit      | m                       |
| ZC3H13                       | Affinity        | DF4623                  | P                        | rabbit      | P                       |
| IRDye Goat anti-Mouse 680RD  | LI-COR          | 926-68070               | S                        | goat        | p                       |
| IRDye Goat anti-Rabbit 800CW | LI-COR          | 926-32211               | S                        | goat        | p                       |

3

4

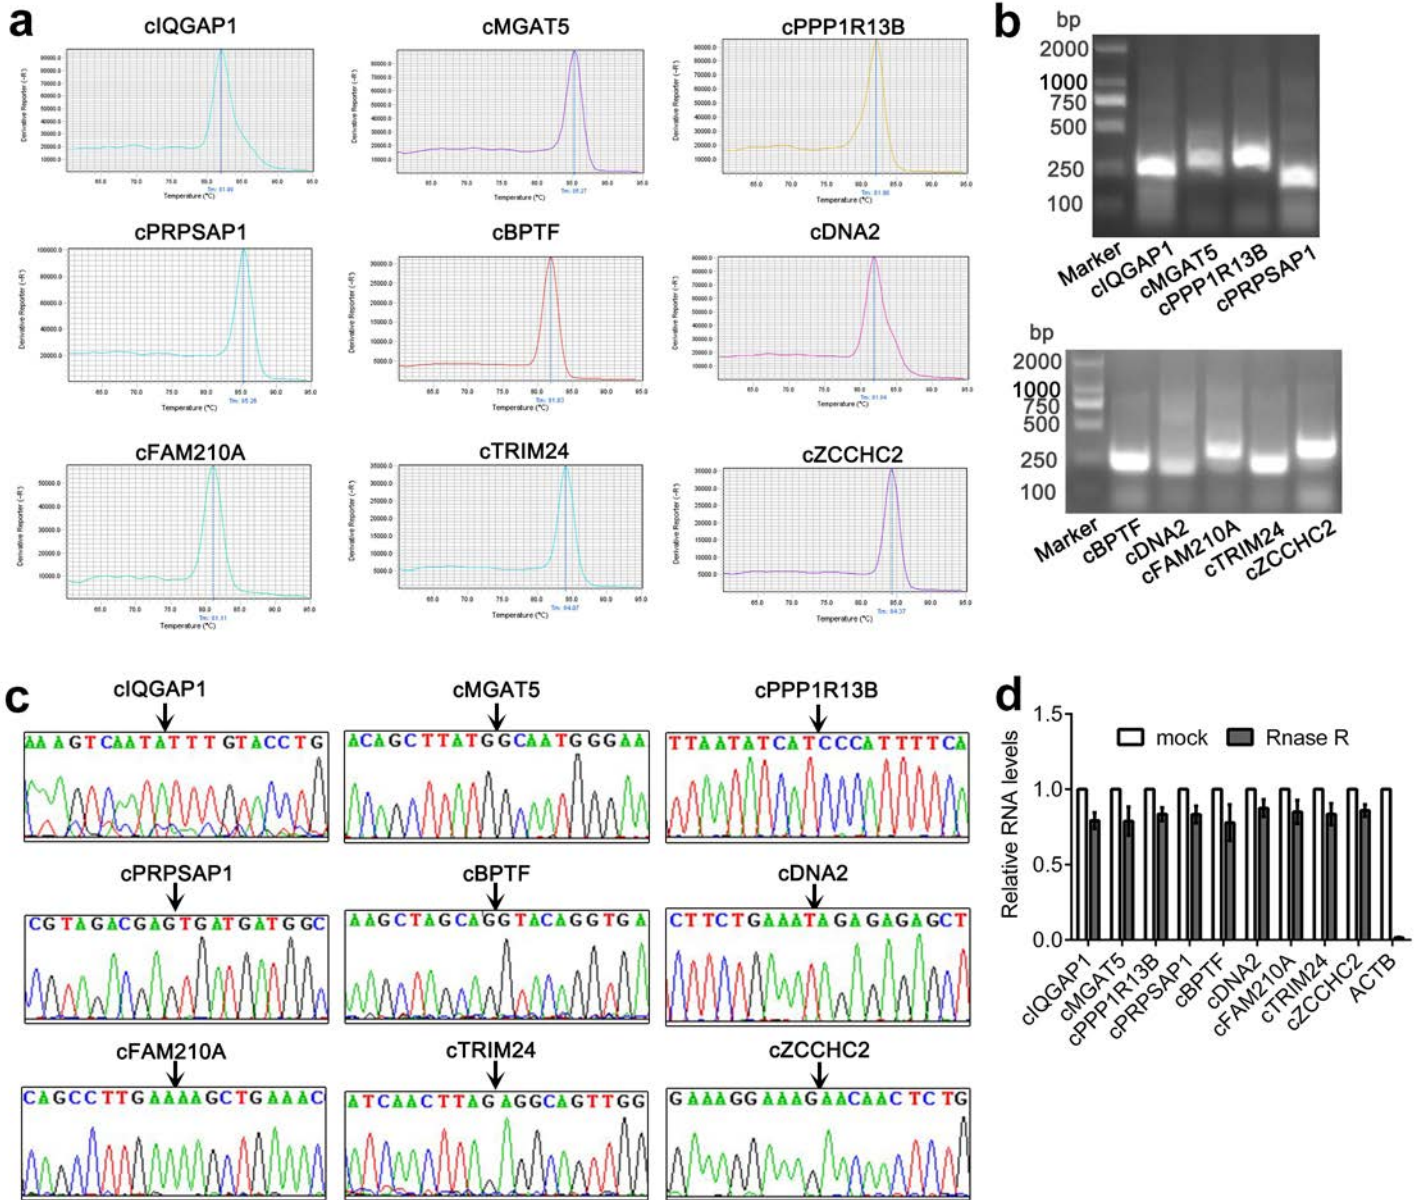

2

3

**Supplementary Fig. 1. Validation of the structure and sizes of candidate circRNAs in HepG2. a**

4

5 Melting curves of qRT-PCR products of candidate circRNAs. **b** DNA electrophoresis showing the

5

6 singularity of qRT-PCR products with divergent primers. **c** Sanger sequencing method showing back-sliced

6

7 sites of candidates. **d** qRT-PCR after RNase R digestion verifying the circular structure of candidates, while

7

8 ACTB mRNA were employed as a negative control.

8

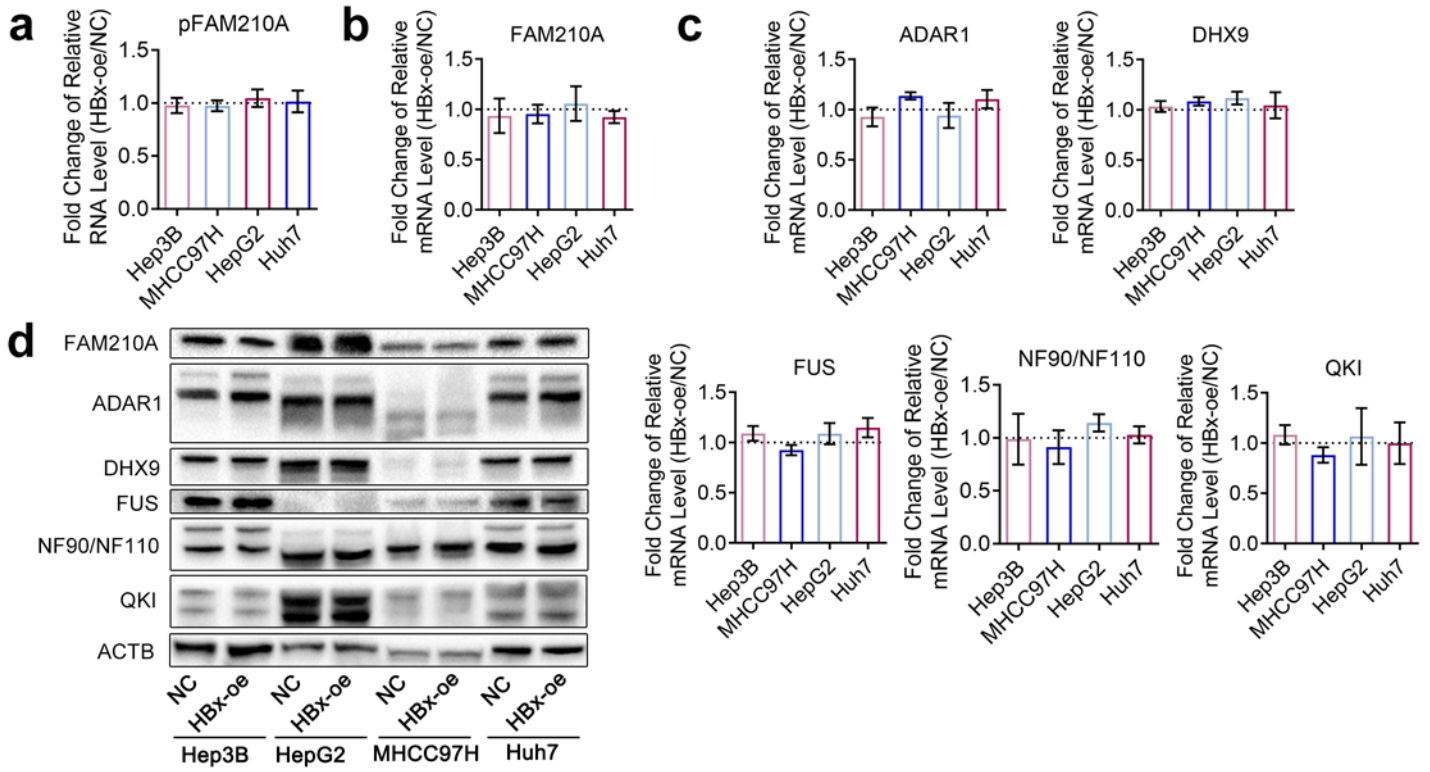

**Supplementary Fig. 2. HBx could not affect the biogenesis of cFAM210A.** a-c qRT-PCR showing the expression of pFAM210A, the mRNA of FAM210A, ADAR1, DHX9, FUS, NF90/NF110 and QKI in HBx-oe HCC cell lines (normalized to NC). d Western blotting showing the expression of FAM210A, ADAR1, DHX9, FUS, NF90/NF110 and QKI in HCC cell lines. ACTB was used as an endogenous control. pFAM210A, the precursor mRNA of FAM210A; NC, negative control. HBx-oe, HBx-overexpression.

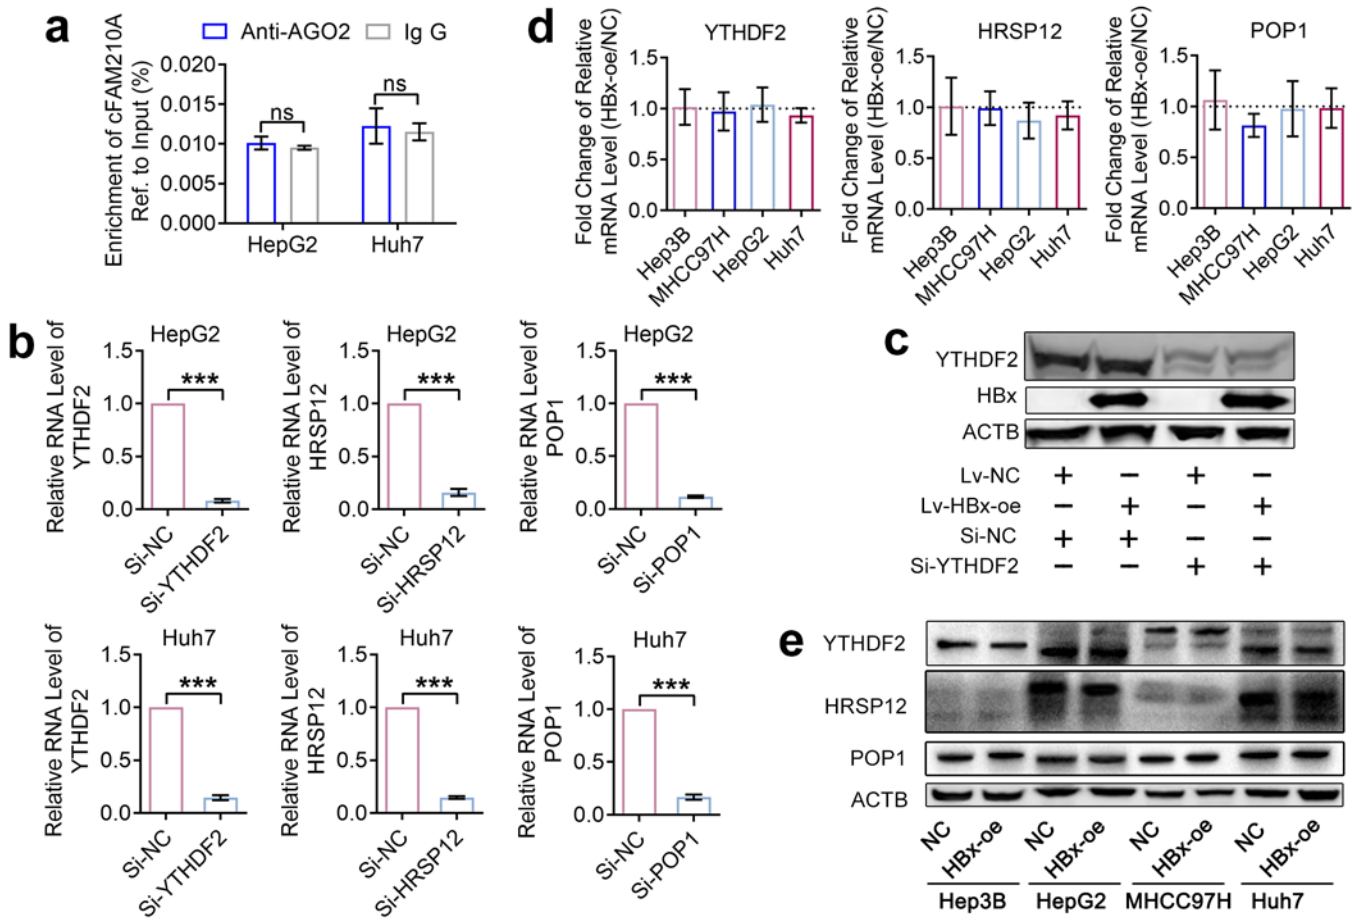

**Supplementary Fig. 3. The experiments about whether HBx could affect the degradation of cFAM210A.** **a** RIP-qPCR using anti-AGO2 antibody was performed in HCC cell lines. **b** qRT-PCR showing the expression of YTHDF2, HRSP12 and POP1 after using siRNAs. **c** Western blotting showing the expression of HBx and YTHDF2 in the rescue assay in HepG2 cells. **d** qRT-PCR showing the expression of YTHDF2, HRSP12 and POP1 in HBx-oe HCC cell lines (normalized to NC). **e** Western blotting showing the expression of YTHDF2, HRSP12 and POP1 in HCC cell lines. For (b) and (d), ACTB was used as an endogenous control. Student's t test was used. NC, negative control; HBx-oe, HBx-overexpression; ns, not significant. \*,  $P < 0.05$ ; \*\*,  $P < 0.01$ ; \*\*\*,  $P < 0.001$ .

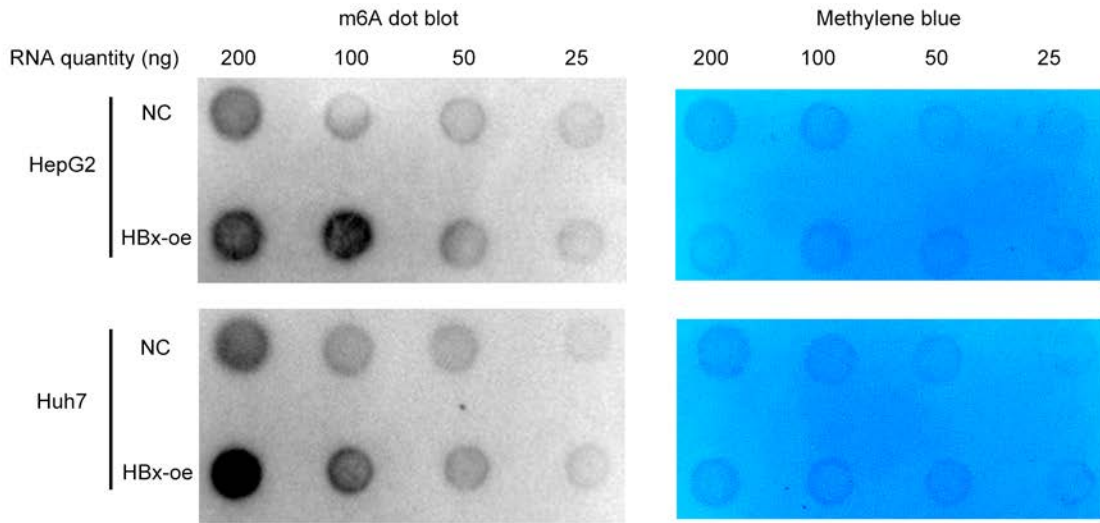

**Supplementary Fig. 4. m6A dot blot assays in HCC cells.** m6A dot blot assays showed the global m6A level of RNA extracted from HBx-overexpressing (HBx-oe) HCC cells and its negative controls. The intensity of dot immunoblotting indicated the m6A level of total RNAs, while methylene blue staining was applied to measure input RNA.

1  
2  
3  
4  
5  
6  
7  
8  
9  
10

**a** Sequence of FAM210A protein (272AA, 31kDa):  
MQWNVPRTVSRLARRTCLEPHNAGLFGHCQNVKGPLLLYNAESKVVLVQGP  
QKQWLHLSAAQCVAKERRPLDAHPPQPGVLRHKQKQHVSRFRVFSSSATAQ  
GTP EKKEEPDPLQDKSISLYQRFKKTRQYGVKVLIPVHLITSGVWFGTFYYAAL  
KGVNVVFPFLELIGLPDSVVSILKNSQSGNALTAYALFKIATPARYTVTLGGTSV  
TVKYLRSHGYMSTPPPVKYQLQDRMEETKELITEKMEETKDRLTEKLQETKE  
KVSFKKKVE

Sequence of predicted cFAM210A protein (159AA, 18kDa):  
MQWNVPRTVSRLARRTCLEPHNAGLFGHCQNVKGPLLLYNAESKVVLVQGP  
QKQWLHLSAAQCVAKERRPLDAHPPQPGVLRHKQKQHVSRFRVFSSSATAQ  
GTP EKKEEPDPLQDKSISLYQRFKKTRQYGVKVLIPVHLITSGVWFGTFYYAAL  
KS

Immunogen sequence of anti-FAM210A antibody (cat no. ab151142, Abcam):  
QWNVPRTVSRLARRTCLEPHNAGLFGHCQNVKGPLLLYNAESKVVLVQGPQ  
KQWLHLSAAQCVAKERRPLDAHPPQPGVLRHKQKQHVSRFRVFSSSATAQG  
TP

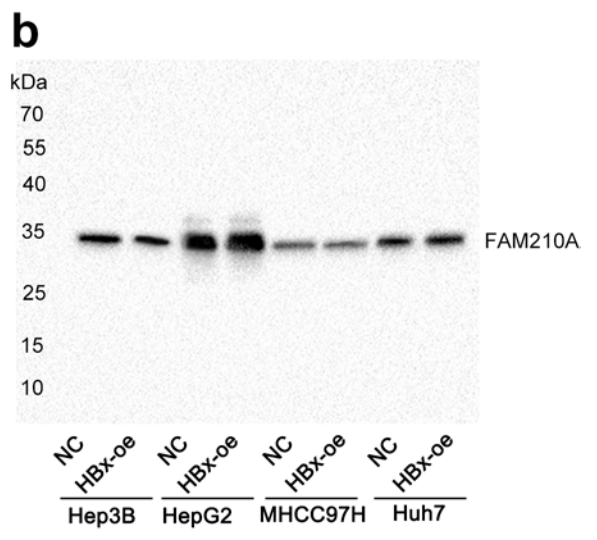

**Supplementary Fig. 5. Western blotting showed that the predicted cFAM210A protein did not exist. a** The sequences of FAM210A protein, predicted cFAM210A protein (predicted by circRNADB) and anti-FAM210A antibody (ab151142) immunogen. The overlapped sequences were highlighted. **b** Western blotting using anti-FAM210A antibody (ab151142) in HCC cells showed FAM210A protein, but not the predicted cFAM210A protein.

1

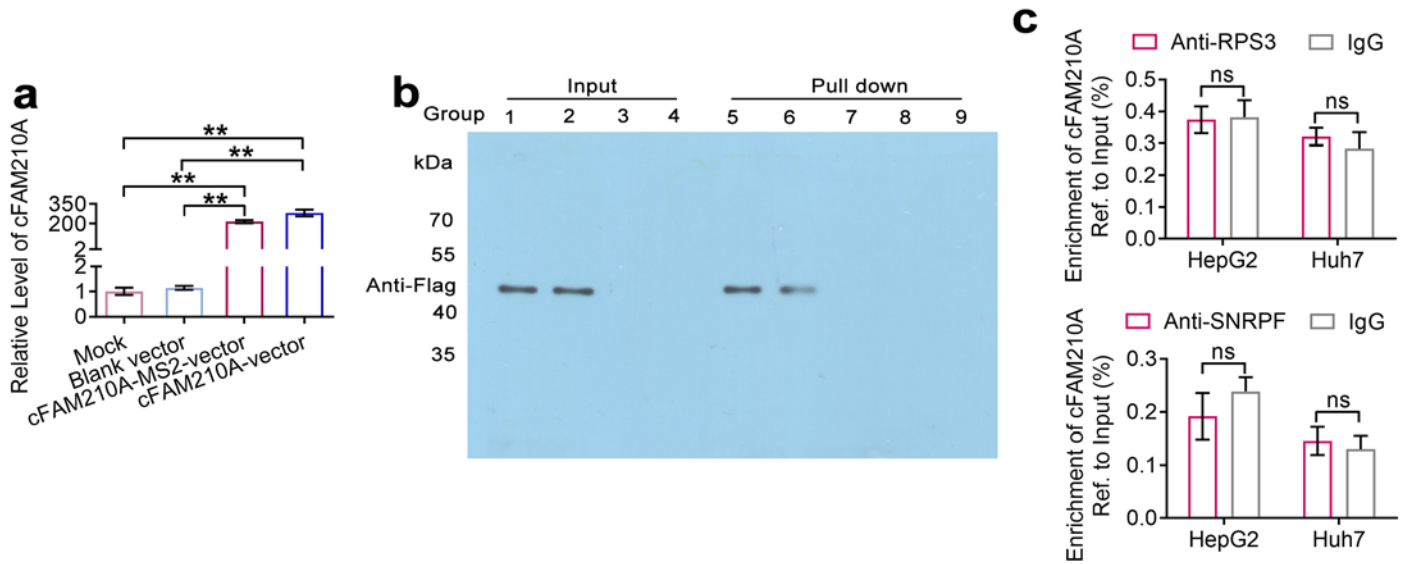

**Supplementary Fig. 6. CircRNA pull down assay and its validation.** **a** qRT-PCR showing the overexpressing effects of vectors in HepG2 cells. **b** Western blotting showed that the flagged proteins were successfully pulled down. **c** RIP-qPCR using anti-RPS3 and anti-SNRPF antibodies in HCC cell lines. For **(a)**, ACTB was used as an endogenous control. For **(a)** and **(c)**, Student's t test was used. ns, not significant. \*,  $P < 0.05$ ; \*\*,  $P < 0.01$ ; \*\*\*,  $P < 0.001$ .

2  
3  
4  
5  
6  
7  
8  
9  
10  
11  
12



1

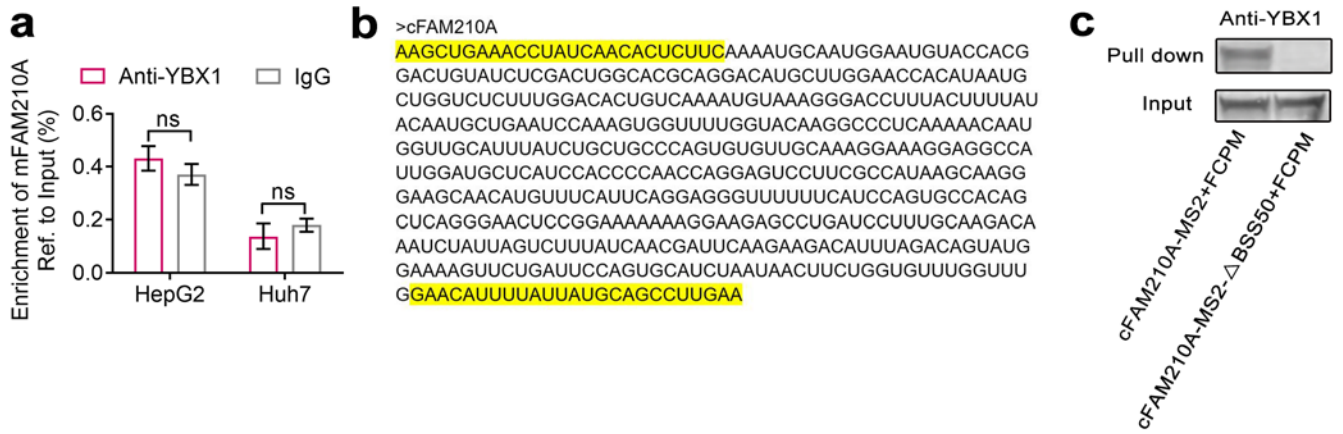

**Supplementary Fig. 7. The determination of the key YBX1-binding sequence on cFAM210A.** **a** RIP-qPCR using an anti-YBX1 antibody showed that mFAM210A can not bind to YBX1. **b** The sequence of cFAM210A. The 50 nucleotides across the its back-splicing site (BSS50) were highlighted. **c** Western blotting following circRNA pull down showed that YBX1 can be enriched by wild-type cFAM210A, but not cFAM210A with BSS50 deletion mutation ( $\Delta$ BSS50). For (a), Student's t test was used. ns, not significant.

2  
3  
4  
5  
6  
7  
8  
9  
10  
11  
12

1

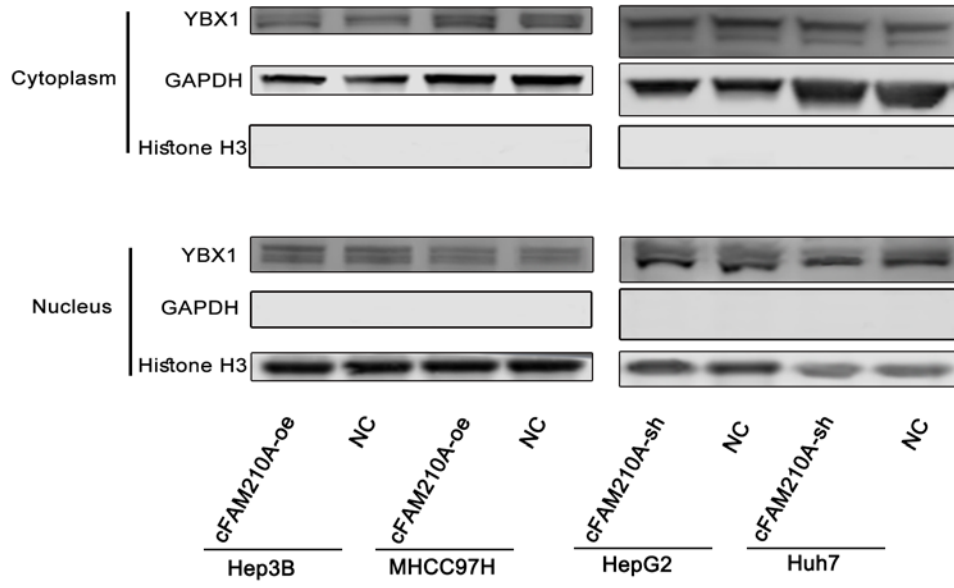

2

3

4

5

6

7

8

9

10

11

**Supplementary Fig. 8. Nuclear extract and following Western blotting assays.** Western blotting showing that the localization of YBX1 did not show significant changes after overexpressing or suppressing cFAM210A.

1

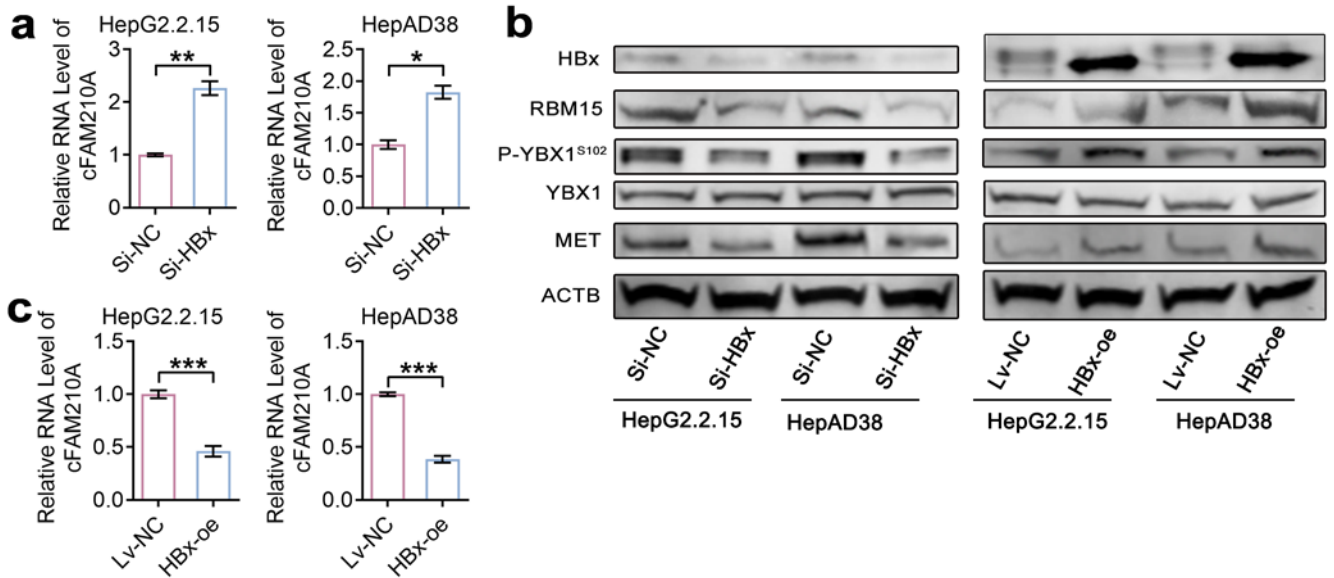

2

3

**Supplementary Fig. 9. The role of HBx on the expression of cFAM210A, RBM15, P-YBX1<sup>S102</sup>, YBX1 and MET in HBV-containing HepG2.2.15 and HepAD38 cells. a, c** qPCR showing the expression of cFAM210A after silencing or overexpressing HBx. **b** Western blotting demonstrating the expression RBM15, P-YBX1<sup>S102</sup>, YBX1 and MET after silencing or overexpressing HBx. For (a) and (c), Student's t test was used. NC, negative control; HBx-oe, HBx-overexpression. \*,  $P < 0.05$ ; \*\*,  $P < 0.01$ ; \*\*\*,  $P < 0.001$ .

9

10

11

12

13

14

1

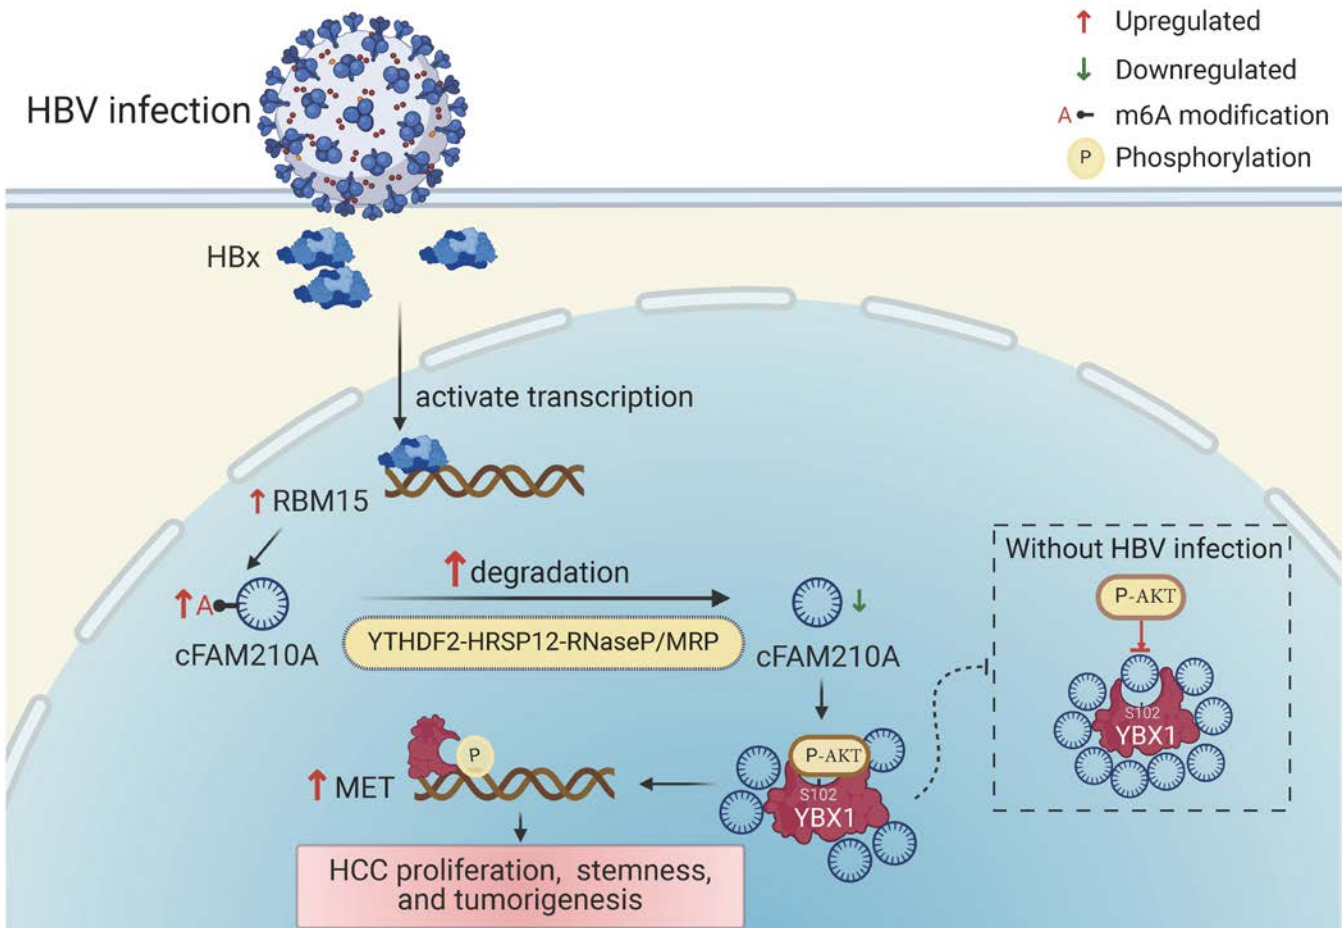

2

3

4

5

6

7

8

9

10

11

Supplementary Fig. 10. The graphical abstract of this study.

## References

- 1
- 2 1 Kechin, A., Boyarskikh, U., Kel, A. & Filipenko, M. cutPrimers: A New Tool for Accurate Cutting of Primers from Reads of  
3 Targeted Next Generation Sequencing. *J Comput Biol* **24**, 1138-1143 (2017).
- 4 2 Dobin, A. *et al.* STAR: ultrafast universal RNA-seq aligner. *Bioinformatics* **29**, 15-21 (2013).
- 5 3 Cheng, J., Metge, F. & Dieterich, C. Specific identification and quantification of circular RNAs from sequencing data.  
6 *Bioinformatics* **32**, 1094-1096 (2016).
- 7 4 Glažar, P., Papavasileiou, P. & Rajewsky, N. circBase: a database for circular RNAs. *Rna* **20**, 1666-1670 (2014).
- 8 5 Ghosal, S., Das, S., Sen, R., Basak, P. & Chakrabarti, J. Circ2Traits: a comprehensive database for circular RNA potentially  
9 associated with disease and traits. *Front Genet* **4**, 283 (2013).
- 10 6 Robinson, M. D., McCarthy, D. J. & Smyth, G. K. edgeR: a Bioconductor package for differential expression analysis of  
11 digital gene expression data. *Bioinformatics* **26**, 139-140 (2010).
- 12 7 Anderson, S. F., Schlegel, B. P., Nakajima, T., Wolpin, E. S. & Parvin, J. D. BRCA1 protein is linked to the RNA polymerase II  
13 holoenzyme complex via RNA helicase A. *Nat Genet* **19**, 254-256 (1998).
- 14 8 Chen, Y. *et al.* Assessment of long-term functional maintenance of primary human hepatocytes to predict drug-induced  
15 hepatotoxicity in vitro. *Arch Toxicol* **95**, 2431-2442 (2021).
- 16 9 Kleeff, J., Kornmann, M., Sawhney, H. & Korc, M. Actinomycin D induces apoptosis and inhibits growth of pancreatic  
17 cancer cells. *Int J Cancer* **86**, 399-407 (2000).
- 18 10 Li, F. *et al.* Circular RNA ITCH has inhibitory effect on ESCC by suppressing the Wnt/beta-catenin pathway. *Oncotarget* **6**,  
19 6001-6013 (2015).
- 20 11 Zheng, Q. *et al.* Circular RNA profiling reveals an abundant circHIPK3 that regulates cell growth by sponging multiple  
21 miRNAs. *Nat Commun* **7**, 11215 (2016).
- 22 12 Ding, W. B. *et al.* HBV/Pregenomic RNA Increases the Stemness and Promotes the Development of HBV-Related HCC  
23 Through Reciprocal Regulation With Insulin-Like Growth Factor 2 mRNA-Binding Protein 3. *Hepatology* **74**, 1480-1495  
24 (2021).
- 25
